# Supplementary material
Source: PubMed Central journal article supplement (PMC535875)
Supplement: plntcell_tpc.104.025973_1.pdf [file plntcell_tpc.104.025973_1.pdf]

## Alanine aminotransferase

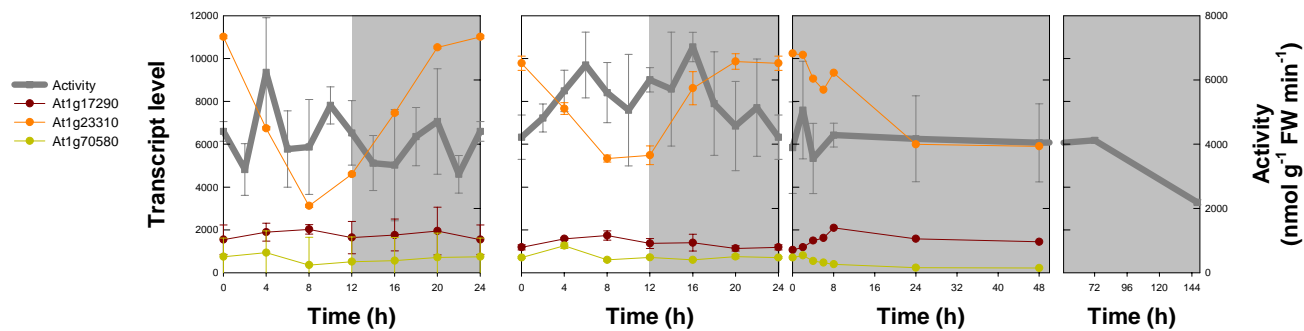

## Aspartate aminotransferase

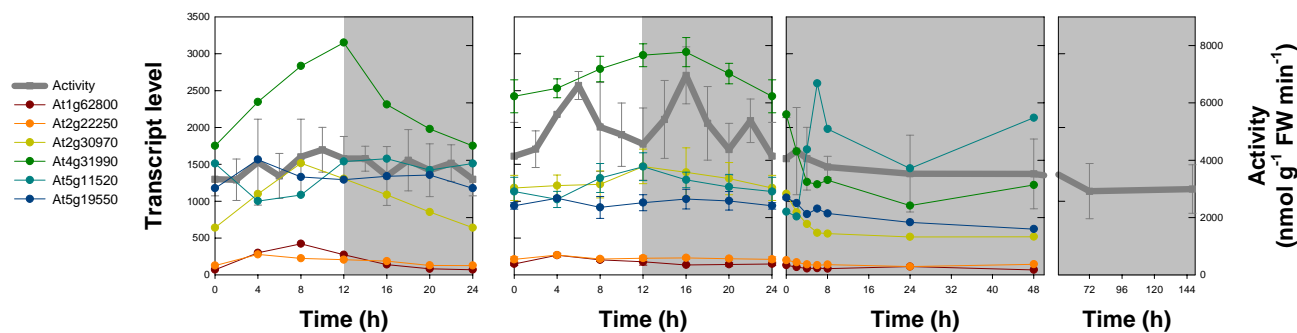

## Cytosolic fructose-1.6-bisphosphatase

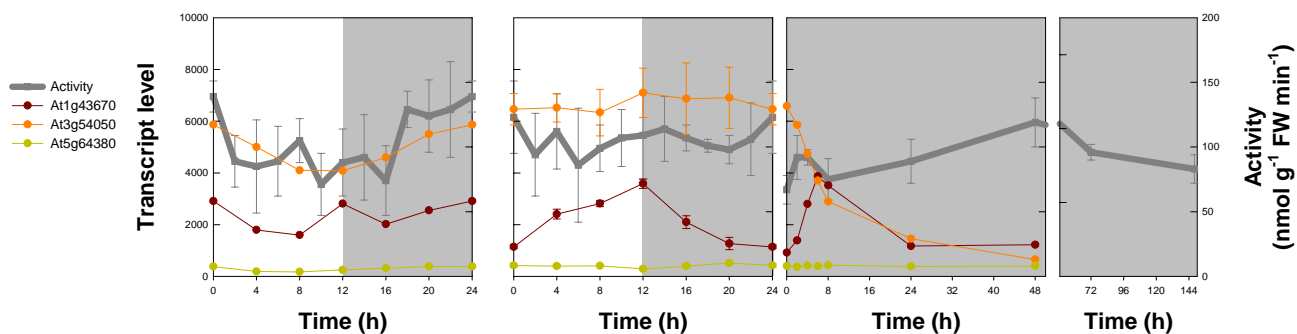

## Fructokinase

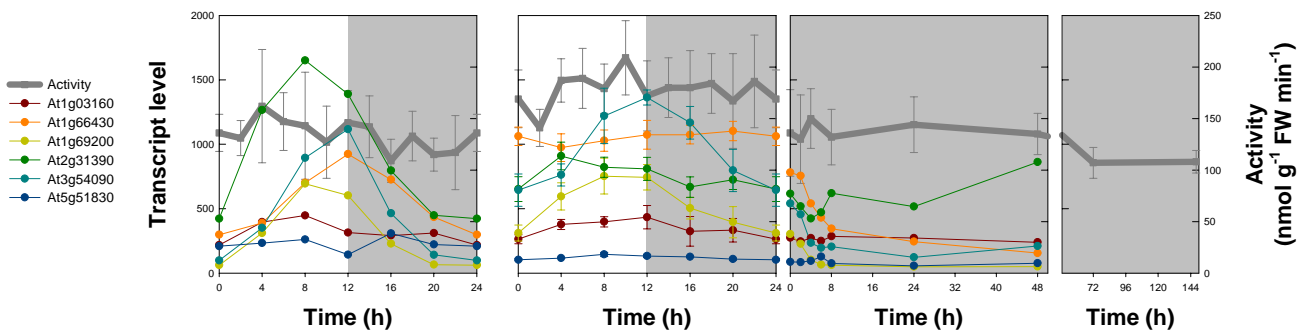

Fig. S1 part I

## Glucokinase (Hexokinase)

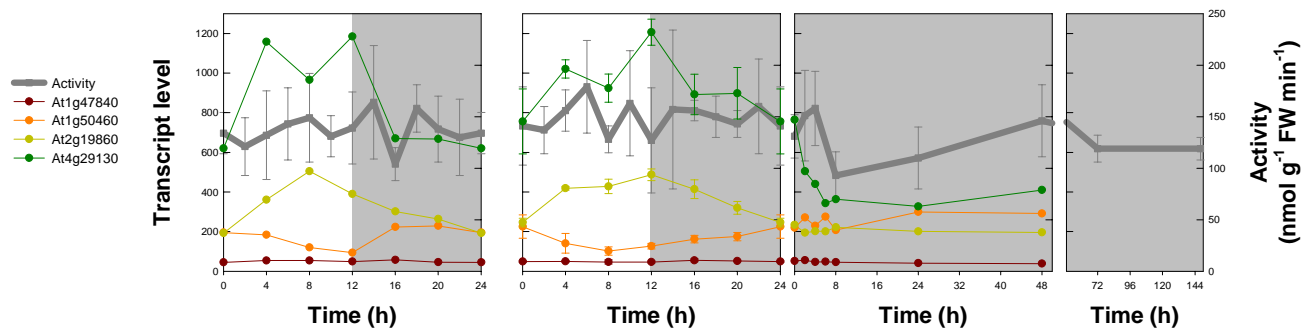

## Glucose-6-phosphate dehydrogenase

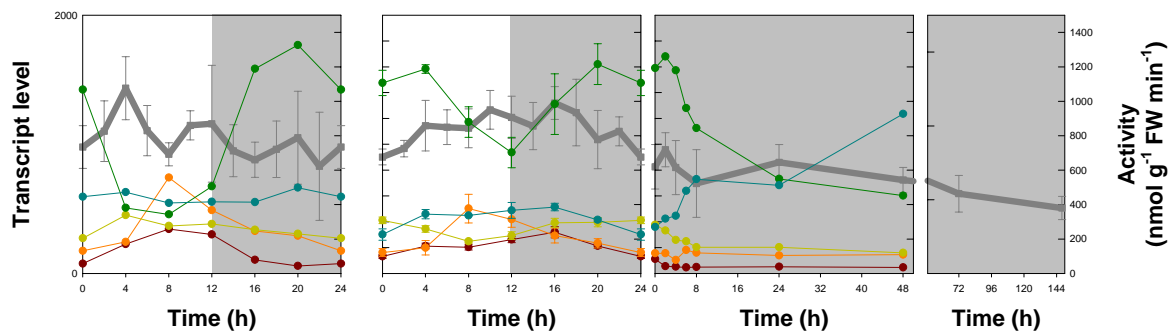

## Glutamine synthetase

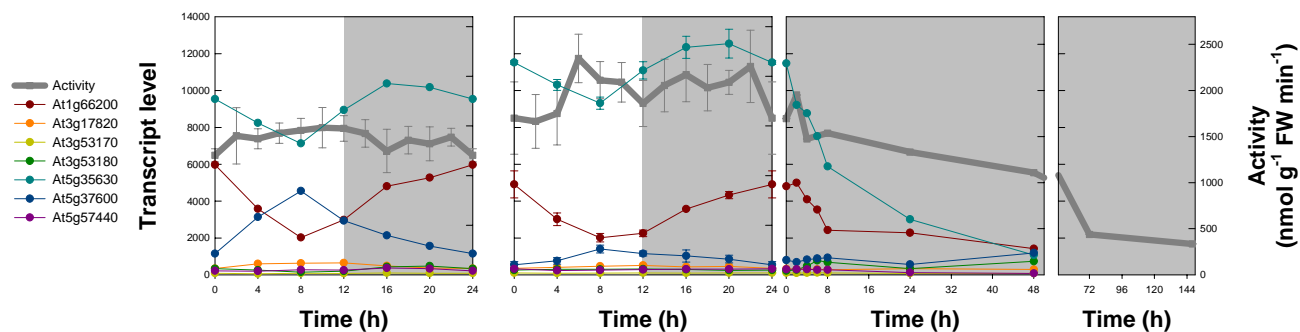

## Glycerokinase

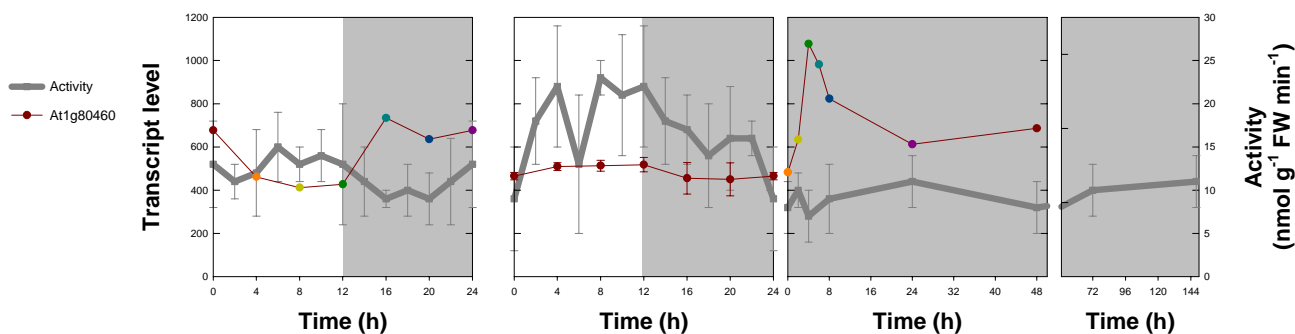

Fig. S1 part II

### Glyceraldehyde-3-phosphate dehydrogenase (NAD-dependent)

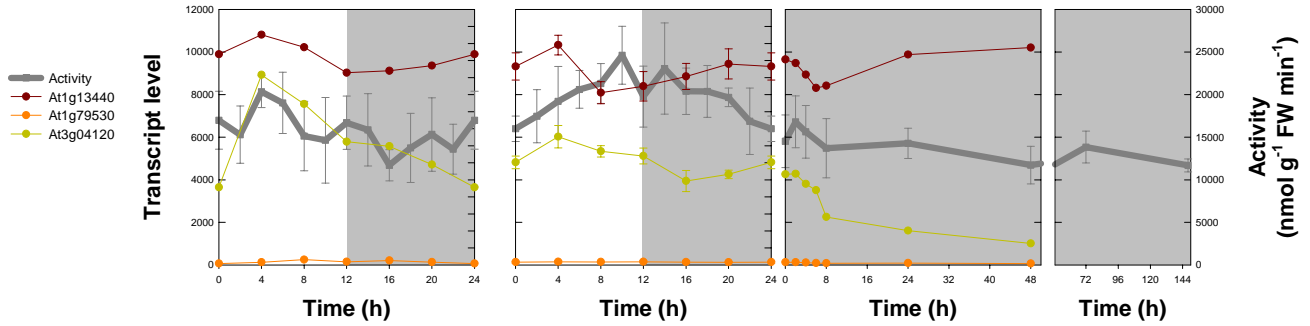

### Glyceraldehyde-3-phosphate dehydrogenase (NADP-dependent)

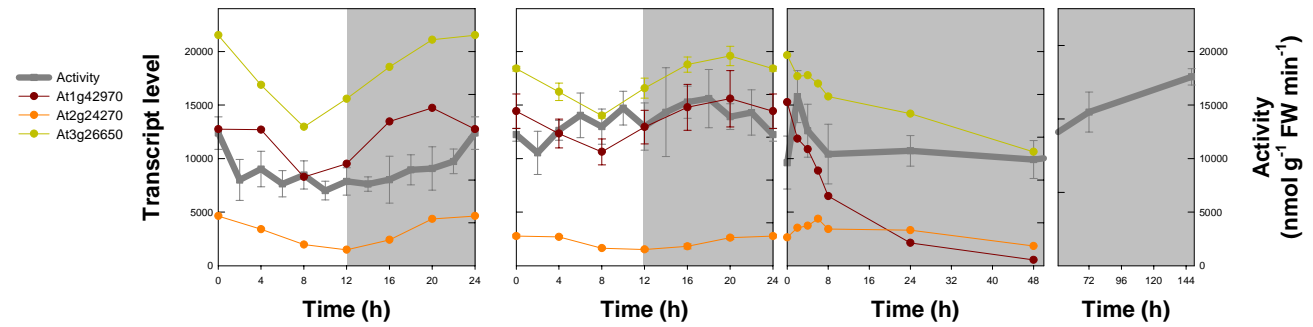

### Acid invertase

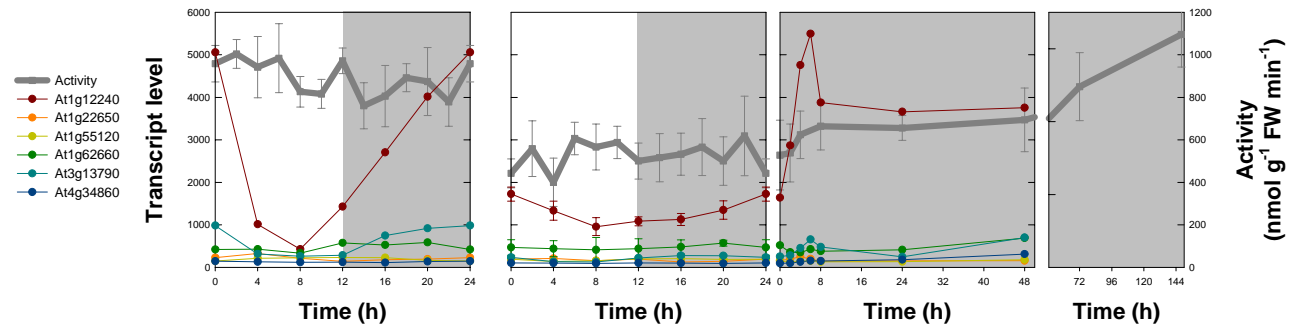

### Isocitrate dehydrogenase (NADP-dependent)

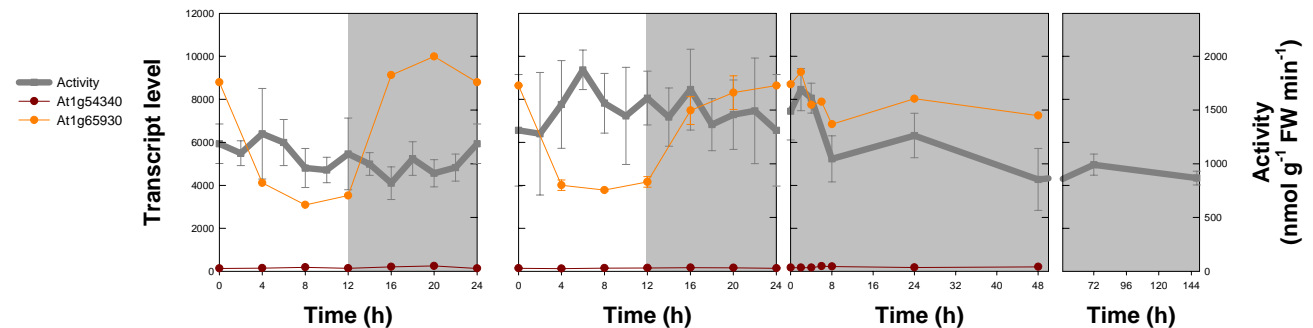

Fig. S1 part III

## Phosphoenolpyruvate carboxylase

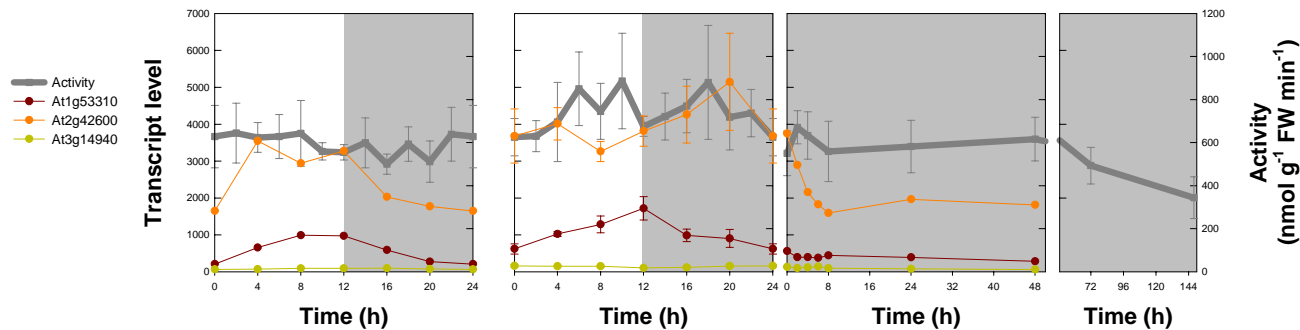

## Pyrophosphate-dependent phosphofructokinase

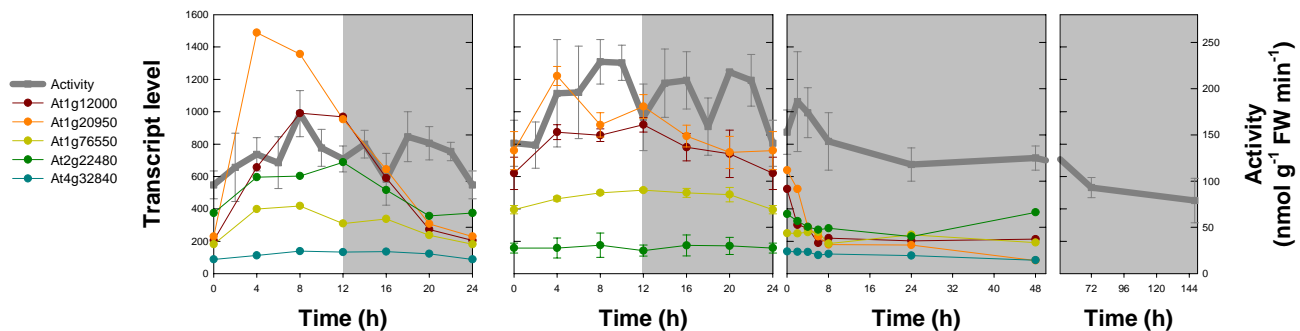

## Pyruvate kinase

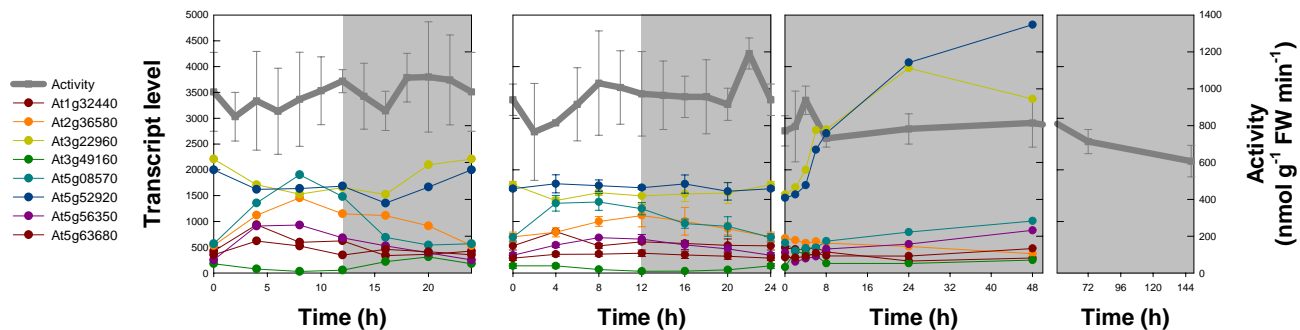

## Shikimate dehydrogenase

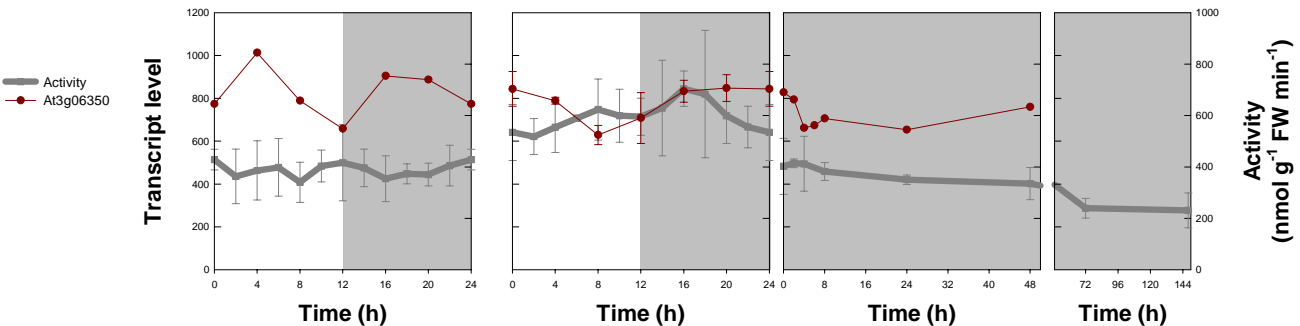

Fig. S1 part IV

## Sucrose-phosphate synthase

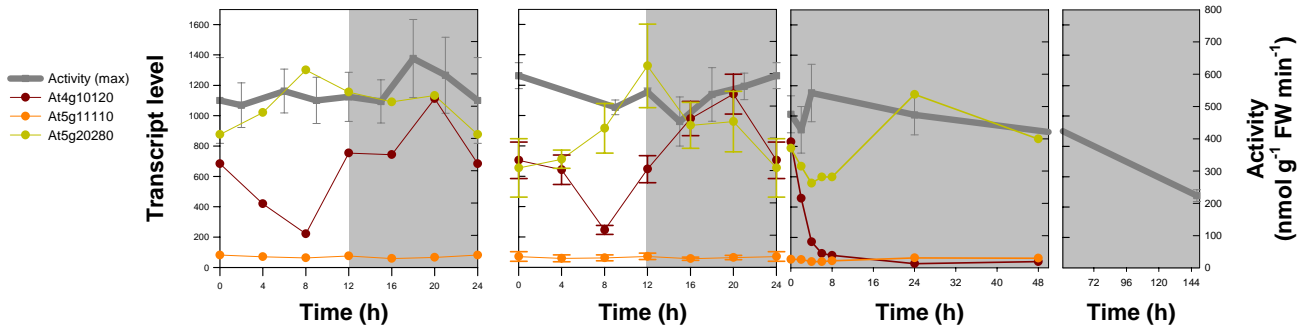

## Transketolase

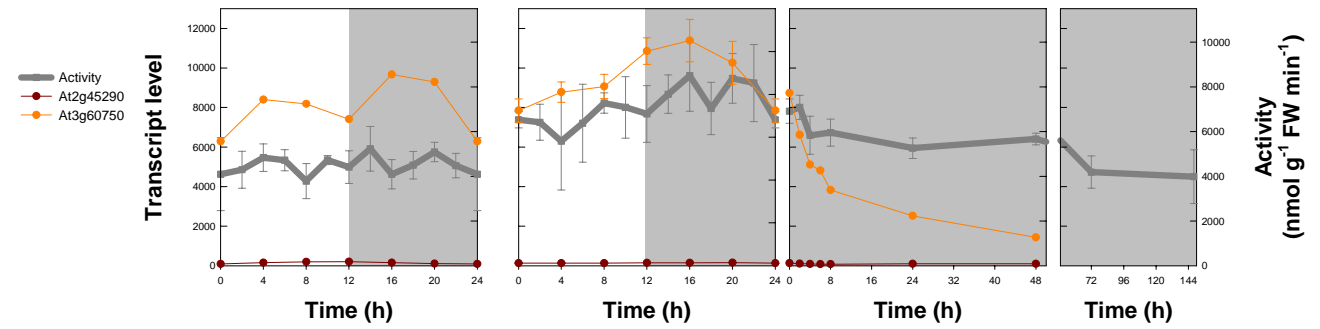

Fig. S1 part V
