# Supplementary material
Source: PubMed Central journal article supplement (PMC535875)

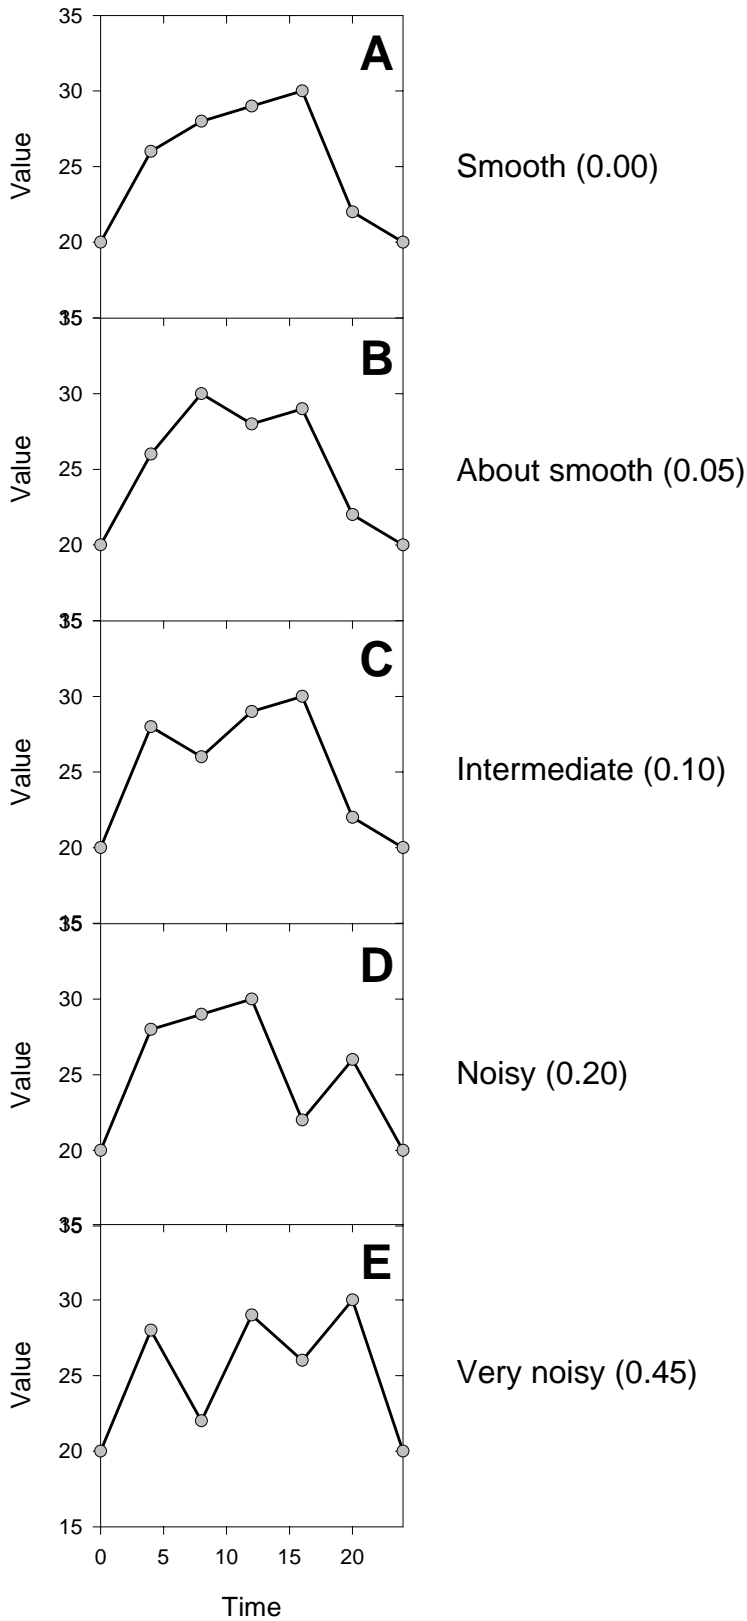

**Fig. S2**

Supplement: plntcell_tpc.104.025973_2.pdf [file plntcell_tpc.104.025973_2.pdf]

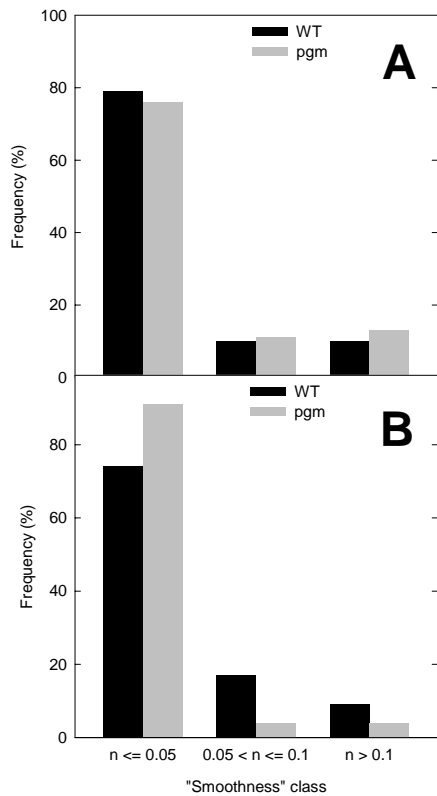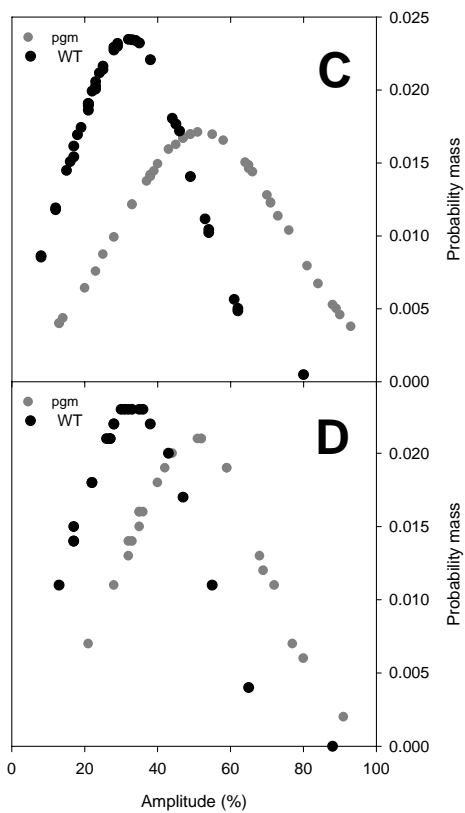

**Fig. S3**

Supplement: plntcell_tpc.104.025973_3.pdf [file plntcell_tpc.104.025973_3.pdf]
